# Supplementary material for: Altered cognitive processes shape tactile perception in autism
Source: eLife. 2026 Jun 10;14:RP108333. doi: 10.7554/eLife.108333 (PMC13252952; doi:10.7554/eLife.108333)
Supplement: Source data 1. [file elife-108333-data1.xlsx]

## Sheet: Fig. 1
B	Training days (nb)	WT	Fmr1-/y
		45	28
		18	32
		29	17
		15	27
		43	23
		33	23
		31	40
		28	45
		21	21
			26
			19
C	Training days - High (nb)	WT	Fmr1-/y
		8	6
		5	6
		6	3
		5	4
		9	7
		3	3
		10	19
		3	17
		6	7
			8
			5
D	Training days - Low (nb)	WT	Fmr1-/y
		32	9
		12	15
		7	6
		5	8
		7	3
		3	9
		10	25
		3	26
		3	5
			9
			5
E	Sensitivity d'	WT	Fmr1-/y
		2.52655	1.36749
		1.79874	1.29211
		1.14923	1.05449
		3.047	0.736173
		1.22416	1.51166
		1.24299	1.22576
		1.43555	1.15155
		0.977131	1.25886
		2.18621	1.45727
			1.06407
			1.66366
F	Correct choice (rate)	WT	Fmr1-/y
		0.8528	0.609091
		0.757623	0.554902
		0.660541	0.644118
		0.917333	0.563448
		0.621277	0.715326
		0.656	0.6416
		0.606111	0.586122
		0.626512	0.625045
		0.559828	0.715897
			0.666341
			0.790588
G	Incorrect choice (rate)	WT	Fmr1-/y
		0.11551	0.215775
		0.16621	0.241386
		0.268406	0.295004
		0.0725047	0.350778
		0.221736	0.218677
		0.226936	0.278914
		0.216081	0.223805
		0.309036	0.215554
		0.124374	0.232458
			0.262364
			0.203241
H	Incorrect choice Low (rate)	WT	Fmr1-/y
		0.0509554	0.192646
		0.130621	0.197321
		0.226601	0.259786
		0.111111	0.312176
		0.126692	0.180723
		0.176904	0.407115
		0.189099	0.163551
		0.277876	0.193571
		0.0596624	0.160569
			0.27767
			0.16129
I	Incorrect choice High (rate)	WT	Fmr1-/y
		0.180064	0.238905
		0.201798	0.285451
		0.310212	0.330222
		0.0338983	0.389381
		0.31678	0.25663
		0.276968	0.150713
		0.243063	0.284058
		0.340196	0.237537
		0.189086	0.304348
			0.247059
			0.245192

## Sheet: Fig. S1
A	Correct choice (%)	50	Incorrect choice (%)	50			A	High amplitude successful trials:									Low amplitude successful trials:
		50		50				Trial 49 licks: -4.734, -3.323, -2.940, -2.798, -2.551, -2.407, -2.262, -2.116, -0.802, 0.514									Trial 3 licks: 0.592
		40		60				Trial 52 licks: -0.085, 0.149, 0.585									Trial 6 licks: 0.653
		90		10				Trial 54 licks: 1.040									Trial 7 licks: -4.094, -3.929, -3.784, -3.633, -3.510, 0.668
		40		50				Trial 55 licks: 0.694									Trial 9 licks: 0.876
		50		10				Trial 61 licks: 0.127, 0.449, 0.794									Trial 10 licks: 0.467, 0.615
		70		20				Trial 62 licks: 0.638									Trial 12 licks: 0.534
		70		10				Trial 63 licks: 0.484, 0.642									Trial 15 licks: 0.615
		90		0				Trial 72 licks: -1.625, -1.465, 0.678									Trial 17 licks: 1.241
		70		10				Trial 76 licks: -8.205, -8.040, -0.649, 0.979									Trial 19 licks: 0.790
								Trial 77 licks: -3.193, 0.797									Trial 20 licks: -0.027, 0.139, 0.275, 0.423, 0.893
								Trial 78 licks: 0.694									Trial 23 licks: 0.987
								Trial 80 licks: 0.857									Trial 24 licks: -1.349, -1.074, -0.928, -0.772, 0.995
								Trial 82 licks: -3.414, -3.264, 0.535									Trial 29 licks: 0.472, 0.611
								Trial 85 licks: 1.137									Trial 30 licks: -0.653, -0.469, -0.314, -0.144, 0.020, 0.178, 0.354, 0.513
								Trial 86 licks: 0.966									Trial 31 licks: 0.455, 0.904
								Trial 87 licks: 0.693									Trial 32 licks: -0.340, 0.851
								Trial 88 licks: 1.344									Trial 33 licks: 0.407, 0.717
								Trial 89 licks: 0.779									Trial 34 licks: 0.572, 0.620
								Trial 95 licks: 0.626									Trial 35 licks: 0.815
																	Trial 36 licks: 0.557
																	Trial 37 licks: -1.599, -1.448, -1.278, -1.127, -0.974, -0.836, -0.697, -0.548, -0.397, -0.230, 0.121, 0.269, 0.447, 0.775
																	Trial 38 licks: 0.691
																	Trial 39 licks: -0.799, -0.635, -0.465, -0.135, 0.014, 0.165, 0.299, 0.448, 0.597
																	Trial 43 licks: -2.010, -1.812, 0.546
																	Trial 48 licks: -7.697, -7.568, -7.436, -5.595, -5.437, 2.282
																	Trial 50 licks: 1.183
																	Trial 59 licks: 0.774
																	Trial 60 licks: -5.050, 0.826
																	Trial 64 licks: 0.580
																	Trial 65 licks: 0.442, 0.591
																	Trial 66 licks: -2.719, 1.028
																	Trial 67 licks: -4.565, 0.480, 0.625
																	Trial 74 licks: 1.110
																	Trial 75 licks: 0.495, 0.652
																	Trial 83 licks: 0.488, 0.631
																	Trial 84 licks: 0.452, 0.602
																	Trial 90 licks: -0.389, -0.220, -0.079, 0.409, 0.576
																	Trial 91 licks: 0.550
																	Trial 93 licks: 1.006
																	Trial 94 licks: -0.429, -0.255, 0.397, 0.879
																	Trial 96 licks: 0.603
																	Trial 97 licks: 0.500, 0.938
																	Trial 99 licks: 0.619
B	Correct choice (%)	100	Incorrect choice (%)	0			B	High amplitude successful trials:										Low amplitude successful trials:
		100		0				Trial 3 licks: 0.875										Trial 1 licks: -6.647, -6.462, 0.496, 0.672
		80		20				Trial 4 licks: 0.958										Trial 2 licks: 0.568
		90		0				Trial 6 licks: 0.418, 0.968										Trial 5 licks: 0.553
		100		0				Trial 8 licks: 0.864										Trial 7 licks: 0.484, 0.662
		90		10				Trial 10 licks: 1.098										Trial 9 licks: 0.529
		100		0				Trial 11 licks: 1.197										Trial 12 licks: 0.870
		100		0				Trial 13 licks: 1.049										Trial 16 licks: 0.456, 0.624
		100		0				Trial 14 licks: 0.749										Trial 17 licks: -5.697, -5.488, -5.316, -5.125, -4.972, -4.792, -4.357, 0.680
		100		0				Trial 15 licks: 0.941										Trial 19 licks: -3.351, -3.160, 0.435, 0.614
								Trial 18 licks: 0.868										Trial 20 licks: 1.082
C	Days in blocks (nb)	WT	Fmr1-/y					Trial 22 licks: 0.872										Trial 23 licks: 0.421, 0.591
		13	10					Trial 26 licks: -0.760, -0.617, -0.418, -0.269, 1.059										Trial 25 licks: 0.879
		6	11					Trial 27 licks: 1.290										Trial 28 licks: 0.603
		15	8					Trial 29 licks: -3.002, 0.834										Trial 31 licks: 0.584
		10	16					Trial 30 licks: -0.945, 0.811										Trial 36 licks: 0.482, 0.801
		15	6					Trial 32 licks: 0.421, 1.009										Trial 38 licks: 0.467, 0.619
		17	14					Trial 33 licks: 0.719										Trial 41 licks: 0.681
		21	15					Trial 35 licks: -5.583, -5.385, -5.235, -4.905, 0.889										Trial 42 licks: 0.501
		25	17					Trial 37 licks: 0.861										Trial 43 licks: -0.224, -0.023, 0.164, 0.317, 0.490, 0.630
		15	12					Trial 39 licks: -0.353, -0.192, -0.047, 0.668										Trial 50 licks: 0.575
			16					Trial 40 licks: 0.713										Trial 53 licks: 0.598
			14					Trial 44 licks: 0.710										Trial 55 licks: 0.170, 0.317, 0.487, 0.642
D	Days in mixed (nb)	WT	Fmr1-/y					Trial 45 licks: 1.017										Trial 56 licks: 0.491, 0.659
		32	18					Trial 46 licks: -1.370, -1.174, -1.011, -0.832, -0.687, 0.792										Trial 58 licks: 0.520
		12	21					Trial 47 licks: 0.579										Trial 61 licks: -9.380, -9.216, -9.064, -8.864, 0.746
		14	9					Trial 48 licks: 0.870										Trial 63 licks: 0.467, 0.651
		5	11					Trial 49 licks: 0.721										Trial 64 licks: -0.179, 0.136, 0.307, 0.464, 0.648
		28	17					Trial 51 licks: 1.110										Trial 65 licks: -1.304, -1.098, -0.954, -0.608, 0.545
		16	9					Trial 52 licks: 0.242, 0.781										Trial 67 licks: 0.898
		10	25					Trial 54 licks: 0.692										Trial 73 licks: 0.553
		3	28					Trial 57 licks: 0.764										Trial 76 licks: 0.532
		6	9					Trial 59 licks: -4.069, -3.873, -3.747, -3.196, -2.991, -2.824, -2.637, -2.481, -2.327, -2.186, 0.644										Trial 77 licks: -2.667, -2.487, -2.334, -1.611, 0.490, 0.672
			10					Trial 62 licks: 0.648										Trial 78 licks: 0.548
			5					Trial 66 licks: -1.541, -1.362, -1.183, -1.043, -0.865, -0.718, 0.753										Trial 80 licks: 0.574
E	Correct choice High (rate)	WT	Fmr1-/y					Trial 68 licks: 0.843										Trial 82 licks: 0.743
		0.813505	0.691218					Trial 69 licks: -2.715, -2.530, -2.372, -2.175, -2.031, -1.854, 0.608										Trial 86 licks: 0.478, 0.796
		0.75025	0.67035					Trial 70 licks: -0.451, 0.822										Trial 88 licks: 0.155, 0.379, 0.531
		0.655106	0.659277					Trial 71 licks: -4.631, -4.454, -4.320, -4.153, -4.016, -3.318, -3.034, -2.825, -2.658, -2.189, -1.999, 0.678										Trial 89 licks: 0.588
		0.966102	0.597345					Trial 72 licks: 0.555										Trial 93 licks: -0.924, -0.567, -0.406, 0.226, 0.385, 0.544
		0.532671	0.725429					Trial 74 licks: 0.651										Trial 94 licks: 0.531
		0.623907	0.839104					Trial 75 licks: 0.540										Trial 99 licks: 0.535
		0.710322	0.568116					Trial 79 licks: -1.887, 0.646										Trial 100 licks: 0.516
		0.65098	0.653226					Trial 81 licks: 0.771
		0.735195	0.679089					Trial 83 licks: 0.885
			0.682353					Trial 84 licks: -5.617, -5.440, -5.301, -5.134, -4.988, 0.683
			0.75					Trial 85 licks: 0.582
F	Correct choice Low (rate)	WT	Fmr1-/y					Trial 87 licks: 0.650
		0.89172	0.539568					Trial 90 licks: 0.623
		0.765525	0.458011					Trial 91 licks: 0.580
		0.667488	0.628707					Trial 92 licks: 0.777
		0.873737	0.533679					Trial 95 licks: 1.054
		0.713048	0.705572					Trial 96 licks: 0.619
		0.683047	0.513834					Trial 97 licks: 0.580
		0.501669	0.609346					Trial 98 licks: -0.342, -0.184, -0.025, 0.782
		0.604425	0.598183
		0.439173	0.752033
			0.650485
			0.829493

## Sheet: Fig. S2
A		Genotype	Day 1	Day 2	Day 3	Day 4	Day 5	Day 6	Day 7	Day 8	Day 9	Day 10	Day 11	Day 12	Day 13	Day 14	Day 15	Day 16	Day 17	Day 18	Day 19	Day 20	Day 21	Day 22	Day 23	Day 24	Day 25	Day 26	Day 27	Day 28
	Correct choice rate	WT	0.78	0.84	0.493333	0.946667	0.926667	0.893333
			0.766667	0.876923	0.88	0.67	0.56	0.82	0.74	0.653333	0.66	0.826667	0.713333	0.773333	0.49	0	0.766667	0.858108
			0.59	0.54	0.52	0.49	0.42	0.32	0.22	0.826667	0.806667	0.84
			0.86	0.96	0.925714
			0.666667	0.6	0.3	0.46	0.47	0.62	0.46	0.58	0.533333	0.473333	0.4	0.44	0.47	0.626667	0.48	0.593333	0.82	0.645	0.657143	0.72	0.533333	0.773333	0.81457	0.408	0.913333	0.706667	0.788571	0.902857
			0.36	0.4	0.34	0.586667	0.46	0.526667	0.6	0.595	0.564286	0.68	0.764	0.855
			0.39	0.3	0.49	0.725	0.916
		Fmr1-/y	0.51	0.61	0.44	0.57	0.486667		0.375	0.725	0.695	0.655	0.244	0.694444	0.79		0.8	0.683333	0.655	0.91
			0.471429	0.24	0.275	0.77	0.513333	0.34	0.405	0.205	0.2	0.22	0.42	0.380488	0.508571	0.828571	0.76	0.76	0.539326	0.836667	0.8	0.652	0.688442
			0.56	0.54	0.5	0.475	0.6	0.68	0.746667	0.773333	0.753333
			0.72	0.74	0.56	0.3	0.695	0.59	0.85625	0.855	0.64	0.835	0.705	0.47	0.52	0.78	0.846667	0.87	0.775
			0.46	0.4	0.406667	0.62	0.8	0.57	0.735	0.732	0.768
			0.925373	0.13	0.33	0.39	0.413333	0.64	0.31	0.304	0.573333	0.38	0.0887097	0.16	0.726667	0.1	0.5	0.38	0.461538	0.8	0.676923	0.766667	0.36	0	0.846667	0.933333	0.777778
			0.640244	0.3	0.784	0.255556	0.24	0.86	0.415	0.44	0.66	0.513333	0.54	0.45	0.32	0.1	0.3	0.52	0.464	0.546667	0.6	0.52	0.26	0.82	0.805	0.82	0.13	0.793333	0.726667	0.968
			0.76	0.552632	0.62	0.69	0.813333	0.34	0.82	0.77	0.88
			0.66	0.64	0.64	0.83	0.933333
B	Learning rate (slope)	WT	0.036571
			-0.014904
			0.028727
			0.032857
			0.011969
			0.040096
			0.1477
		Fmr1-/y	0.017329
			0.021908
			0.036194
			0.010018
			0.047244
			0.010907
			0.008503
			0.019702
			0.073667
C	Performance at training oncet	WT	0.685333
			0.817628
			0.399333
			0.849524
			0.428458
			0.300345
			0.1211
		Fmr1-/y	0.451676
			0.273957
			0.444398
			0.601477
			0.373963
			0.337182
			0.404982
			0.595487
			0.519667
D	Intraindividual variability (SD)	WT	0.168074
			0.214826
			0.213668
			0.050816
			0.160057
			0.157161
			0.252623
		Fmr1-/y	0.171263
			0.224154
			0.115379
			0.160188
			0.158594
			0.276009
			0.236568
			0.167943
			0.134048
				Days_used
E	Intermediate stage learning (slope)	WT	0.216667	[3, 4, 5]
			0.0866667	[8, 9, 10]
			-0.1	[5, 6, 7]
			0.0328571	[1, 2, 3]
			-0.0166667	[14, 15, 16]
			0.0341667	[6, 7, 8]
			0.2125	[2, 3, 4]
		Fmr1-/y	-0.2255	[9, 10, 11]
			0.0802439	[10, 11, 12]
			0.1025	[4, 5, 6]
			-0.01	[8, 9, 10]
			-0.025	[4, 5, 6]
			-0.03	[12, 13, 14]
			0.21	[14, 15, 16]
			-0.175	[4, 5, 6]
			0.095	[2, 3, 4]
E	Intermediate stage learning (correct choice rate)	WT	0.788889
			0.713333
			0.32
			0.915238
			0.566667
			0.573889
			0.505
		Fmr1-/y	0.531333
			0.340163
			0.585
			0.776667
			0.663333
			0.328889
			0.306667
			0.614444
			0.703333

## Sheet: Fig. 2
A	Criterion c	WT	Fmr1-/y
		0.372387	0.184441
		0.224092	0.205175
		0.175472	0.116757
		-0.302858	0.121605
		0.530091	0.156784
		0.305735	-0.377904
		0.163448	0.404193
		0.100597	0.235384
		0.464507	0.263484
			0.0577445
			0.157339
C	Incorrect Low after Correct High	WT	Fmr1-/y
		0.04	0.18
		0.1	0.44
		0.17	0.22
		0.1	0.25
		0.12	0.14
		0.19	0.3
		0.12	0.14
		0.25	0.19
		0.06	0.09
			0.26
			0.17
D	Incorrect High after Correct Low	WT	Fmr1-/y
		0.11	0.16
		0.18	0.24
		0.29	0.28
		0.02	0.27
		0.45	0.17
		0.16	0.09
		0.24	0.27
		0.26	0.17
		0.38	0.23
			0.2
			0.18
E	Prior choice impact Current Low	WT	Fmr1-/y
		0.25	0.295
		0.265	0.43
		0.295	0.33
		0.295	0.32
		0.175	0.3
		0.32	0.345
		0.24	0.275
		0.355	0.33
		0.085	0.28
			0.36
			0.34
F	Prior choice impact Current High	WT	Fmr1-/y
		0.3	0.285
		0.34	0.18
		0.39	0.385
		0.235	0.33
		0.435	0.315
		0.29	0.21
		0.355	0.395
		0.34	0.305
		0.38	0.345
			0.32
			0.3

## Sheet: Fig. S3
A	Prior Strength - High	WT	Fmr1-/y
		0.265	0.295
		0.3	0.28
		0.33	0.355
		0.275	0.32
		0.27	0.3
		0.305	0.315
		0.295	0.33
		0.335	0.315
		0.22	0.275
			0.35
			0.295
B	Prior Strength - Low	WT	Fmr1-/y
		0.285	0.285
		0.305	0.33
		0.355	0.36
		0.255	0.33
		0.34	0.315
		0.305	0.24
		0.3	0.34
		0.36	0.32
		0.245	0.35
			0.33
			0.345
C	Miss (rate)	WT		Fmr1-/y
		High	Low	High	Low
		0.00643087	0.0573248	0.0698772	0.267786
		0.047952	0.103854	0.0441989	0.344668
		0.0346821	0.105911	0.0105018	0.111507
		0	0.0151515	0.0132743	0.154145
		0.150549	0.16026	0.0179407	0.113705
		0.0991254	0.140049	0.0101833	0.0790514
		0.0466149	0.309232	0.147826	0.227103
		0.00882353	0.117699	0.109238	0.208246
		0.0757191	0.501164	0.0165631	0.0873984
				0.0705882	0.0718447
				0.00480769	0.00921659
D	Miss - High (rate)	WT	Fmr1-/y
		0.00643087	0.0698772
		0.047952	0.0441989
		0.0346821	0.0105018
		0	0.0132743
		0.150549	0.0179407
		0.0991254	0.0101833
		0.0466149	0.147826
		0.00882353	0.109238
		0.0757191	0.0165631
			0.0705882
			0.00480769
E	Miss - Low (rate)	WT	Fmr1-/y
		0.0573248	0.267786
		0.103854	0.344668
		0.105911	0.111507
		0.0151515	0.154145
		0.16026	0.113705
		0.140049	0.0790514
		0.309232	0.227103
		0.117699	0.208246
		0.501164	0.0873984
			0.0718447
			0.00921659

## Sheet: Fig. S4
A	Sensitivity d'	WT	Fmr1-/y
		3.41795	2.21533
		1.86099	1.75645
		3.047	1.53425
		2.45431	1.90869
		1.79818	1.51414
		1.67123	2.454
			3.47498
			2.08862
			1.96006
B	Correct choice - High (rate)	WT	Fmr1-/y
		0.946429	0.789683
		0.966102	0.732877
		0.683673	0.804401
		0.886719	0.766355
		0.77551	0.792079
		0.78273	0.88412
			0.990244
			0.783019
			0.827815
C	Correct choice - Low (rate)	WT	Fmr1-/y
		0.89823	0.722561
		0.873737	0.701923
		0.779412	0.703812
		0.717213	0.868644
		0.763934	0.710327
		0.745704	0.8125
			0.663636
			0.882979
			0.83908
D	Incorrect choice - High (rate)	WT	Fmr1-/y
		0.0446429	0.111111
		0.0338983	0.244292
		0.234694	0.193154
		0.0585938	0.224299
		0.208163	0.19802
		0.206128	0.111588
			0.0097561
			0.183962
			0.165563
E	Incorrect choice - Low (rate)	WT	Fmr1-/y
		0.0353982	0.0792683
		0.111111	0.128205
		0.0833333	0.249267
		0.106557	0.118644
		0.180328	0.241814
		0.154639	0.104167
			0.127273
			0.0957447
			0.155172
F	Criterion c	WT	Fmr1-/y
		0.0978058	0.302345
		0.452499	0.25669
		-0.302858	-0.090324
		0.0178925	0.227448
		0.117646	-0.0565881
		0.0784995	0.0311616
			-0.59811
			0.261878
			0.0344672
G	Correct High after correct High (rate)	WT	Fmr1-/y
		0.51	0.42
		0.45	0.53
		0.49	0.52
		0.47	0.36
		0.42	0.36
		0.46	0.5
			0.49
			0.49
			0.4
H	Correct Low after correct low (rate)	WT	Fmr1-/y
		0.48	0.46
		0.49	0.38
		0.45	0.39
		0.42	0.45
		0.45	0.43
		0.31	0.43
			0.36
			0.45
			0.51
I	Incorrect High after correct Low (rate)	WT	Fmr1-/y
		0.02	0.07
		0.02	0.18
		0.19	0.2
		0.03	0.16
		0.12	0.1
		0.2	0.12
			0.01
			0.13
			0.12
J	Incorrect Low after correct High (rate)	WT	Fmr1-/y
		0.02	0.07
		0.1	0.06
		0.08	0.19
		0.07	0.11
		0.17	0.17
		0.06	0.08
			0.06
			0.05
			0.17
K	Prior choice impact - Current High	WT	Fmr1-/y
		0.534775	0.543965
		0.740444	0.726589
		0.47	0.721765
		0.528926	0.524906
		0.667437	0.4646
		0.548963	0.622672
			0.5
			0.641171
			0.523467
L	Prior choice impact - Current Low	WT	Fmr1-/y
		0.535545	0.660989
		0.614318	0.530039
		0.599077	0.608554
		0.594826	0.56721
		0.410954	0.630159
		0.656597	0.556364
			0.531034
			0.51087
			0.683931
M	Miss - High (rate)	WT	Fmr1-/y
		0.00892857	0.0992063
		0	0.0228311
		0.0816327	0.00244499
		0.0546875	0.00934579
		0.0163265	0.00990099
		0.0111421	0.00429185
			0
			0.0330189
			0.00662252
N	Miss - Low (rate)	WT	Fmr1-/y
		0.0663717	0.198171
		0.0151515	0.169872
		0.137255	0.0469208
		0.17623	0.0127119
		0.0557377	0.0478589
		0.0996564	0.0833333
			0.209091
			0.0212766
			0.00574713

## Sheet: Fig. 3
A	Psychometric curves	Genotype	12	14	16	18	20
		WT	0.038961	0	0.0365854	0.128713	0.417582
			0.0608696	0.104348	0.246575	0.443478	0.708661
			0.0326087	0.0288462	0.122449	0.237113	0.613208
			0.0833333	0.196581	0.333333	0.504132	0.673469
			0.122449	0.315436	0.464912	0.466102	0.729508
			0.104348	0.142857	0.221429	0.243697	0.478261
		Fmr1-/y	0.113208	0.195652	0.346939	0.555556	0.74359
			0.0333333	0.243902	0.446809	0.448276	0.736842
			0.0512821	0.206349	0.24	0.55814	0.72549
			0.0909091	0.0948276	0.216	0.4	0.571429
			0	0.130435	0.208333	0.36	0.461538
			0.0384615	0.117647	0.228571	0.426471	0.552632
			0.0361446	0.0840336	0.305556	0.52381	0.742574
			0.02	0.152542	0.288462	0.482759	0.689655
			0.0133333	0.0945946	0.0857143	0.154762	0.524272
B	High-salience lick rate 26um vs 24 um	WT		Fmr1-/y
		24um	26um	24um	26um
		0.987952	0.955882	1	1
		0.876712	0.97541	0.878788	0.863636
		1	0.988095	0.945455	0.98
		0.917431	0.970874	0.761538	0.936
		0.892308	0.965217	0.714286	0.83871
		0.775	0.875	0.786885	0.893939
				0.969697	0.981818
				1	1
				1	0.971831
C	High-salience lick rate 26um vs 22 um	WT		Fmr1-/y
		22um	26um	22um	26um
		0.80303	0.955882	0.913793	1
		0.815789	0.97541	0.868421	0.863636
		0.895349	0.988095	0.795918	0.98
		0.888889	0.970874	0.686441	0.936
		0.817391	0.965217	0.652174	0.83871
		0.658537	0.875	0.714286	0.893939
				0.857143	0.981818
				0.929577	1
				0.891304	0.971831
D	High-salience lick rate 12um vs 14 um	WT		Fmr1-/y
		12um	14um	12um	14um
		0.038961	0	0.113208	0.195652
		0.0608696	0.104348	0.0333333	0.243902
		0.0326087	0.0288462	0.0512821	0.206349
		0.0833333	0.196581	0.0909091	0.0948276
		0.122449	0.315436	0	0.130435
		0.104348	0.142857	0.0384615	0.117647
				0.0361446	0.0840336
				0.02	0.152542
				0.0133333	0.0945946
E	High-salience lick rate 12um vs 16 um	WT		Fmr1-/y
		12um	16um	12um	16um
		0.038961	0.0365854	0.113208	0.346939
		0.0608696	0.246575	0.0333333	0.446809
		0.0326087	0.122449	0.0512821	0.24
		0.0833333	0.333333	0.0909091	0.216
		0.122449	0.464912	0	0.208333
		0.104348	0.221429	0.0384615	0.228571
				0.0361446	0.305556
				0.02	0.288462
				0.0133333	0.0857143
F	Categorization bias (stimulus amplitude, um)	WT	Fmr1-/y
		20.5455	17.4545
		18.5455	17.7273
		19.5455	18
		17.9091	19.6364
		17.2727	20.4545
		20.4545	19.5455
			18
			18.0909
			20
G	Categorization precision (Slope, a.u)	WT	Fmr1-/y
		0.357355	0.417372
		0.391663	0.390553
		0.389401	0.401455
		0.398323	0.341544
		0.383976	0.308402
		0.31813	0.344484
			0.413749
			0.411453
			0.377131
H	Sensitivity d' (a.u)	WT	Fmr1-/y
		2.4449	1.88427
		1.80488	1.52629
		2.39846	1.7193
		1.67716	1.47988
		1.44759	1.36654
		1.43763	1.46563
			1.92969
			2.02887
			2.38185

## Sheet: Fig. 4
A	Delta(Discrimination)	WT		Fmr1-/y
		18 vs 20 um	low salience	18 vs 20 um	low salience
		0.28887	0.0299173	0.188034	0.147449
		0.265183	0.127536	0.288566	0.138314
		0.376094	0.0681682	0.167351	0.168952
		0.169337	0.140266	0.171429	0.10303
		0.263407	0.114551	0.101538	0.12
		0.234563	0.0464499	0.126161	0.129336
				0.218765	0.162555
				0.206897	0.154253
				0.36951	0.0471429
B	Delta(Discrimination)	WT		Fmr1-/y
		18 vs 20 um	high salience	18 vs 20 um	high salience
		0.28887	0.179433	0.188034	0.0854701
		0.265183	0.0889161	0.288566	0.0422648
		0.376094	0.124963	0.167351	0.0848366
		0.169337	0.0991348	0.171429	0.121524
		0.263407	0.0785697	0.101538	0.125724
		0.234563	0.132246	0.126161	0.113769
				0.218765	0.079748
				0.206897	0.103448
				0.36951	0.149186
C	Delta(18-20um) - mean delta(within category 2um pairs)	WT	Fmr1-/y
		0.149397	0.072043
		0.140982	0.161177
		0.059612*	0.057609
		0.153599	0.034001
		0.276647*	-0.015947
		0.182693	0.045993
			0.102299
			0.047695
			0.277342*
		*outlier

## Sheet: Fig. S5
A	Low-salience lick rate 12um vs 14 um	WT		Fmr1-/y
		12um	14um	12um	14um
		0.961039	1	0.773585	0.782609
		0.886957	0.878261	0.833333	0.609756
		0.967391	0.971154	0.923077	0.777778
		0.908333	0.786325	0.848485	0.844828
		0.809524	0.66443	0.85	0.826087
		0.86087	0.809524	0.769231	0.735294
				0.891566	0.915966
				0.88	0.644068
				0.986667	0.905405
B	Correct choice - High (rate)	WT	Fmr1-/y
		0.772727	0.927536
		0.844794	0.836601
		0.857939	0.863415
		0.867416	0.74187
		0.850622	0.675926
		0.691552	0.729323
			0.889157
			0.900433
			0.824207
C	Correct choice - Low (rate)	WT	Fmr1-/y
		0.944444	0.647668
		0.763747	0.578231
		0.890026	0.728205
		0.709474	0.746988
		0.640152	0.771739
		0.796545	0.665493
			0.742169
			0.648402
			0.910891
D	Incorrect choice - High (rate)	WT	Fmr1-/y
		0.227273	0.0676329
		0.141454	0.156863
		0.142061	0.131707
		0.121348	0.25
		0.149378	0.324074
		0.308448	0.176692
			0.101205
			0.0995671
			0.172911
E	Incorrect choice - Low (rate)	WT	Fmr1-/y
		0.0555556	0.295337
		0.215886	0.306122
		0.104859	0.261538
		0.28	0.200803
		0.327652	0.184783
		0.178503	0.197183
			0.243373
			0.242009
			0.0891089
H	Criterion c	WT	Fmr1-/y
		0.412165	-0.425879
		-0.109194	-0.218738
		0.0529379	-0.228412
		-0.253793	0.100131
		-0.317395	0.252515
		0.203883	0.0988896
			-0.250108
			-0.295012
			0.1679

## Sheet: Fig. 5
A	Miss rate - High	WT				Fmr1-/y
		20 um	22 um	24 um	26 um	20 um	22 um	24 um	26 um
		0	0	0	0	0.025641	0	0	0
		0.00787402	0.0175439	0.0136986	0.0163934	0	0	0	0.0227273
		0	0	0	0	0.0196078	0	0	0
		0.0306122	0.00740741	0.00917431	0	0.0168067	0.00847458	0.00769231	0
		0	0	0	0	0	0	0	0
		0	0	0	0	0.118421	0.047619	0.147541	0.0606061
						0.00990099	0.0190476	0	0.00909091
						0	0	0	0
						0	0.0108696	0	0
B	Miss rate - Low	WT				Fmr1-/y
		12 um	14 um	16 um	18 um	12 um	14 um	16 um	18 um
		0	0	0	0	0.113208	0.0217391	0.0408163	0.0444444
		0.0521739	0.0173913	0	0.0173913	0.133333	0.146341	0.106383	0.0689655
		0	0.0102041	0.0103093	0	0.025641	0.015873	0	0
		0.00833333	0.017094	0	0.0165289	0.0606061	0.0603448	0.032	0.056
		0.0680272	0.0201342	0.0175439	0.0169492	0.15	0.0434783	0	0
		0.0347826	0.047619	0	0.0168067	0.192308	0.147059	0.128571	0.0735294
						0.0722892	0	0	0
						0.1	0.20339	0.0769231	0.0517241
						0	0	0	0

[truncated: 1 more sheets: Fig. 6]
