# Supplementary material for: Altered cognitive processes shape tactile perception in autism
Source: eLife. 2026 Jun 10;14:RP108333. doi: 10.7554/eLife.108333 (PMC13252952; doi:10.7554/eLife.108333)
Supplement: Supplementary file 1. [file elife-108333-supp1.xlsx]

## Sheet: Fig. 3 
Mixed effects model during tactile discrimination/categorization
	Mixed Linear Model Regression Results
	=========================================================================
	Model: MixedLM Dependent Variable: Score
	No. Observations: 120 Method: REML
	No. Groups: 15 Scale: 0.0061
	Min. group size: 8 Log-Likelihood: 89.8574
	Max. group size: 8 Converged: Yes
	Mean group size: 8.0
	-------------------------------------------------------------------------
	Coef. Std.Err. z P>|z| [0.025 0.975]
	-------------------------------------------------------------------------
	Intercept 0.044 0.033 1.329 0.184 -0.021 0.109
	Genotype[T.WT] 0.030 0.052 0.566 0.571 -0.073 0.132
	Amplitude[T.14] 0.103 0.037 2.780 0.005 0.030 0.175
	Amplitude[T.16] 0.219 0.037 5.931 0.000 0.147 0.291
	Amplitude[T.18] 0.390 0.037 10.578 0.000 0.318 0.463
	Amplitude[T.20] 0.595 0.037 16.113 0.000 0.522 0.667
	Amplitude[T.22] 0.768 0.037 20.813 0.000 0.696 0.840
	Amplitude[T.24] 0.851 0.037 23.064 0.000 0.779 0.923
	Amplitude[T.26] 0.897 0.037 24.297 0.000 0.824 0.969
	Genotype[T.WT]:Amplitude[T.14] -0.045 0.058 -0.771 0.440 -0.159 0.069
	Genotype[T.WT]:Amplitude[T.16] -0.055 0.058 -0.944 0.345 -0.169 0.059
	Genotype[T.WT]:Amplitude[T.18] -0.127 0.058 -2.175 0.030 -0.241 -0.013
	Genotype[T.WT]:Amplitude[T.20] -0.065 0.058 -1.112 0.266 -0.179 0.049
	Genotype[T.WT]:Amplitude[T.22] -0.029 0.058 -0.491 0.624 -0.143 0.086
	Genotype[T.WT]:Amplitude[T.24] -0.017 0.058 -0.285 0.776 -0.131 0.098
	Genotype[T.WT]:Amplitude[T.26] -0.015 0.058 -0.262 0.794 -0.130 0.099
	Group Var 0.004 0.024

## Sheet: Fig. 5
Mixed effects model for Miss rates
	Low salience trials										High salience trials
	Mixed Linear Model Regression Results										Mixed Linear Model Regression Results
	=========================================================================										=========================================================================
	Model: MixedLM Dependent Variable: Score										Model: MixedLM Dependent Variable: Score
	No. Observations: 60 Method: REML										No. Observations: 60 Method: REML
	No. Groups: 15 Scale: 0.0008										No. Groups: 15 Scale: 0.0002
	Min. group size: 4 Log-Likelihood: 90.5518										Min. group size: 4 Log-Likelihood: 123.4576
	Max. group size: 4 Converged: Yes										Max. group size: 4 Converged: Yes
	Mean group size: 4.0										Mean group size: 4.0
	-------------------------------------------------------------------------										-------------------------------------------------------------------------
	Coef. Std.Err. z P>|z| [0.025 0.975]										Coef. Std.Err. z P>|z| [0.025 0.975]
	-------------------------------------------------------------------------										-------------------------------------------------------------------------
	Intercept 0.027 0.019 1.452 0.147 -0.010 0.064										Intercept 0.006 0.011 0.587 0.557 -0.015 0.028
	Genotype[T.KO] 0.067 0.024 2.765 0.006 0.019 0.114										Genotype[T.KO] 0.015 0.014 1.044 0.296 -0.013 0.042
	Amplitude[T.14] -0.008 0.016 -0.520 0.603 -0.040 0.023										Amplitude[T.22] -0.002 0.008 -0.273 0.785 -0.018 0.014
	Amplitude[T.16] -0.023 0.016 -1.385 0.166 -0.055 0.009										Amplitude[T.24] -0.003 0.008 -0.315 0.753 -0.019 0.014
	Amplitude[T.18] -0.016 0.016 -0.978 0.328 -0.048 0.016										Amplitude[T.26] -0.004 0.008 -0.445 0.656 -0.020 0.013
	Genotype[T.KO]:Amplitude[T.14] -0.015 0.021 -0.701 0.483 -0.056 0.027										Genotype[T.KO]:Amplitude[T.22] -0.009 0.011 -0.875 0.381 -0.030 0.012
	Genotype[T.KO]:Amplitude[T.16] -0.029 0.021 -1.370 0.171 -0.070 0.012										Genotype[T.KO]:Amplitude[T.24] -0.001 0.011 -0.122 0.903 -0.022 0.020
	Genotype[T.KO]:Amplitude[T.18] -0.045 0.021 -2.160 0.031 -0.087 -0.004										Genotype[T.KO]:Amplitude[T.26] -0.007 0.011 -0.675 0.500 -0.028 0.014
	Group Var 0.001 0.024										Group Var 0.001 0.018
	=========================================================================										=========================================================================

## Sheet: Fig. 6
	Trial history integration during tactile categorization.
	Generalized Linear Model Regression Results														=== Genotype × history interaction model ===
	==============================================================================														Generalized Linear Model Regression Results
	Dep. Variable: choice No. Observations: 9895														==============================================================================
	Model: GLM Df Residuals: 9889														Dep. Variable: choice No. Observations: 9895
	Model Family: Binomial Df Model: 5														Model: GLM Df Residuals: 9885
	Link Function: Logit Scale: 1.0000														Model Family: Binomial Df Model: 9
	Method: IRLS Log-Likelihood: -4266.7														Link Function: Logit Scale: 1.0000
	Date: Fri, 30 Jan 2026 Deviance: 8533.5														Method: IRLS Log-Likelihood: -4261.0
	Time: 19:42:24 Pearson chi2: 1.01e+04														Date: Fri, 30 Jan 2026 Deviance: 8522.0
	No. Iterations: 5 Pseudo R-squ. (CS): 0.4066														Time: 19:42:24 Pearson chi2: 1.01e+04
	Covariance Type: cluster														No. Iterations: 5 Pseudo R-squ. (CS): 0.4073
	====================================================================================														Covariance Type: cluster
	coef std err z P>|z| [0.025 0.975]														===========================================================================================
	------------------------------------------------------------------------------------														coef std err z P>|z| [0.025 0.975]
	const -0.4766 0.161 -2.964 0.003 -0.792 -0.161														-------------------------------------------------------------------------------------------
	stim_z 1.9374 0.150 12.959 0.000 1.644 2.230														const -0.3593 0.214 -1.680 0.093 -0.778 0.060
	prev_stim_z -0.1157 0.041 -2.823 0.005 -0.196 -0.035														stim_z 1.9699 0.189 10.427 0.000 1.600 2.340
	previous_outcome 0.0877 0.098 0.891 0.373 -0.105 0.280														prev_stim_z 0.0098 0.044 0.224 0.823 -0.076 0.096
	previous_choice 1.1625 0.098 11.848 0.000 0.970 1.355														previous_outcome 0.0382 0.095 0.403 0.687 -0.147 0.224
	genotype_WT -0.0673 0.218 -0.309 0.757 -0.494 0.359														previous_choice 1.0143 0.174 5.826 0.000 0.673 1.356
	====================================================================================														genotype_WT -0.2825 0.312 -0.905 0.365 -0.894 0.329
															genotype_x_stim -0.0537 0.291 -0.185 0.854 -0.624 0.517
															genotype_x_prev_outcome 0.0877 0.181 0.486 0.627 -0.266 0.442
															genotype_x_prev_choice 0.2744 0.187 1.468 0.142 -0.092 0.641
															genotype_x_prev_stim -0.2317 0.057 -4.032 0.000 -0.344 -0.119
															===========================================================================================
